# Supplementary material for: Is There Any Improvement of the Coagulation Imbalance in Sickle Cell Disease after Hematopoietic Stem Cell Transplantation?
Source: MDPI journal article supplement (doi:10.3390/jcm8111796), 2019-10-26
Supplement: s1 [file s1]

**Table S1** - Thrombin generation parameters for NC and for SCD children before and after successful allogeneic hematopoietic stem cell transplantation.

| Parameters                    | NC                 | Before HSCT           | 3 months after HSCT  | 6 months after HSCT  | 9 months after HSCT  | 12 months after HSCT | 15 months after HSCT  | Comparison NC versus before HSCT | Comparison before versus 3 months after HSCT |
|-------------------------------|--------------------|-----------------------|----------------------|----------------------|----------------------|----------------------|-----------------------|----------------------------------|----------------------------------------------|
| ETP without TM (nM.min)       | 681.5 (313 – 1355) | 1010 (806.6 – 1117)   | 938.2 (795.3 – 1318) | 1021 (803.3 – 1329)  | 1050 (878.3 – 1261)  | 925.7 (743.9 – 1298) | 992.0 (844.8 – 1263)  | P < 0.0001                       | NS                                           |
| ETP with TM (nM.min)          | 426 (157 – 905)    | 956.1 (753 – 1139)    | 780.0 (564.7 – 1268) | 899.5 (616.4 – 1224) | 888.0 (520 – 1103)   | 768.9 (388.5 – 1189) | 870.8 (493 – 1239)    | P < 0.0001                       | NS                                           |
| Reduction of ETP (%)          | 61 (34 – 96)       | 1.4 (-8.4 – 11.2)     | 12.5 (2.2 – 35.1)    | 16.2 (3 – 23.3)      | 21.8 (-1.1 – 40.8)   | 15.4 (-1.8 – 47.8)   | 18.3 (1.8 – 41.6)     | P < 0.0001                       | P = 0.0195                                   |
| Peak without TM (nM)          | 81.5 (23 – 173.2)  | 183.1 (134.7 – 219.3) | 136.1 (78.1 – 215.4) | 134.9 (64.6 – 208.8) | 142.1 (91.2 – 190.1) | 129.9 (53.2 – 236.2) | 132.9 (106.2 – 192.2) | P < 0.0001                       | P = 0.0371                                   |
| Peak with TM (nM)             | 84 (24.7 – 168)    | 187.0 (145.9 – 234)   | 139.6 (78.5 – 225.6) | 142.5 (75.3 – 201.9) | 151.2 (73.5 – 200.8) | 130.0 (47.8 – 243.4) | 149.3 (76 – 211.7)    | P < 0.0001                       | P = 0.0371                                   |
| Velocity without TM (nM/min)  | 21 (3.8 – 42.7)    | 62.5 (29 – 78)        | 31.5 (12 – 52.7)     | 29 (7.9 – 56.9)      | 29.8 (18.3 – 67.1)   | 26.2 (7 – 74.8)      | 29.8 (20.5 – 66.2)    | P < 0.0001                       | p=0.0098                                     |
| Velocity with TM (nM/min)     | 28.9 (6.2 – 68.7)  | 62.9 (36.5 – 89)      | 34.4 (15.9 – 64.9)   | 35 (12.2 – 58.8)     | 37.8 (17 – 75.1)     | 30.8 (9.6 – 86.4)    | 35.6 (18.9 – 63.5)    | P < 0.0001                       | p= 0.0195                                    |
| Time to peak without TM (min) | 9.8 (7.6 – 13)     | 6.7 (5 – 8.3)         | 8.1 (6.7 – 11.5)     | 8.5 (6.4 – 12.3)     | 8.4 (5.4 – 9.7)      | 8.7 (7.5 – 11.7)     | 8.3 (6.4 – 11)        | P < 0.0001                       | p= 0.0137                                    |
| Time to peak with TM (min)    | 9.2 (7 – 12.7)     | 6.6 (5.3 – 8)         | 7.7 (6.3 – 9.5)      | 8.2 (6.3 – 10.3)     | 7.6 (5.3 – 9.5)      | 7.7 (7 – 10.4)       | 7.5 (6.3 – 9.7)       | P < 0.0001                       | p= 0.0093                                    |
| Lagtime without TM (min)      | 5.3 (3.9 – 8.3)    | 3.5 (2.6 – 4.0)       | 3.6 (3.1 – 4.8)      | 4.0 (3.1 – 4.7)      | 3.5 (2.6 – 4.5)      | 4.0 (3.3 – 6.0)      | 3.7 (2.9 – 6.2)       | P < 0.0001                       | p = 0,0578                                   |
| Lagtime with TM (min)         | 6 (4.1 – 9)        | 3.3 (2.6 – 4.0)       | 3.7 (3.3 – 4.7)      | 4.0 (3.1 – 4.5)      | 3.5 (2.6 – 5)        | 3.9 (3 – 6)          | 3.7 (2.9 – 5.8)       | P < 0.0001                       | P = 0,0195                                   |

Data are expressed as median and range. ETP: endogenous thrombin potential, TM: thrombomodulin, HSCT: hematopoietic stem cell transplantation.
